# Supplementary material for: Aromatic heterocyclic anion based ionic liquids and electrolytes
Source: Royal Society of Chemistry journal article supplement (doi:10.1039/d2cp05272e), 2023-01-01
Supplement: d2cp05272e1.pdf [file d2cp05272e1.pdf]

**Electronic Supplementary Information**

**Aromatic heterocyclic anion based ionic liquids and  
electrolytes**

**Mukhtiar Ahmed<sup>1</sup>, Soniya S. Rao<sup>2</sup>, Andrei Filippov<sup>1</sup>, Patrik Johansson<sup>2\*</sup>, and Faiz Ullah  
Shah<sup>1\*</sup>**

<sup>1</sup>Chemistry of Interfaces, Luleå University of Technology, SE-971 87 Luleå, Sweden

<sup>2</sup>Department of Physics, Chalmers University of Technology, SE-412 96 Gothenburg, Sweden

\*Corresponding authors:

[patrik.johansson@chalmers.se](mailto:patrik.johansson@chalmers.se)

[faiz.ullah@ltu.se](mailto:faiz.ullah@ltu.se)

## Synthesis and Characterization

**(P<sub>4444</sub>)(3-PyrA):** Transparent yellowish room temperature liquid. MS (ESI). [C<sub>16</sub>H<sub>36</sub>P]<sup>+</sup>: Calcd m/z 259.2556. Found m/z 259.2555, [C<sub>6</sub>H<sub>4</sub>NO<sub>2</sub>]<sup>-</sup>: Calcd m/z 122.0247, Found m/z 122.0222. <sup>1</sup>H NMR (400.21 MHz, CDCl<sub>3</sub>), δ(ppm): 9.19-9.20 (m, 1H), 8.47-8.49 (m, 1H), 8.28-8.21 (m, 1H), 7.17-7.20 (m, 1H), 2.31-2.36 (m, 8H, P-CH<sub>2</sub>-), 1.42-1.51 (m, 16H, -CH<sub>2</sub>-), 0.93-0.96 (t, 3J<sub>HH</sub> = 7.1 Hz, 12H, -CH<sub>3</sub>) ppm. <sup>13</sup>C NMR (100.64 MHz, CDCl<sub>3</sub>): 169.88, 151.33, 149.58, 136.97, 135.52, 122.60, 24.17, 24.02, 23.93, 23.88, 19.05, 18.58, 13.56 ppm. <sup>31</sup>P NMR (162.01 MHz, CDCl<sub>3</sub>): 33.12 ppm.

**(P<sub>4444</sub>)(4-PyrA):** White solid, MS (ESI). [C<sub>16</sub>H<sub>36</sub>P]<sup>+</sup>: Calcd m/z 259.2556. Found m/z 259.2562, [C<sub>6</sub>H<sub>4</sub>NO<sub>2</sub>]<sup>-</sup>: Calcd m/z 122.0247. Found m/z 122.0188. <sup>1</sup>H NMR (400.21 MHz, CDCl<sub>3</sub>), δ(ppm): 8.52-8.54 (m, 2H), 7.82-7.84 (m, 2H), 2.29-2.36 (m, 8H, P-CH<sub>2</sub>-), 1.46-1.49 (m, 16H, -CH<sub>2</sub>-), 0.90-0.93 (t, 3J<sub>HH</sub> = 7.1 Hz, 12H, -CH<sub>3</sub>) ppm. <sup>13</sup>C NMR (100.64 MHz, CDCl<sub>3</sub>): 169.77, 148.16, 123.72, 24.17, 24.02, 23.92, 23.87, 19.04, 18.58, 13.56 ppm. <sup>31</sup>P NMR (162.01 MHz, CDCl<sub>3</sub>): 33.10 ppm.

**(P<sub>4444</sub>)(2-PyrA):** Yellowish gel. MS (ESI). [C<sub>16</sub>H<sub>36</sub>P]<sup>+</sup>: Calcd m/z 259.2556. Found m/z 259.2535, MS (ESI). [C<sub>6</sub>H<sub>4</sub>NO<sub>2</sub>]<sup>-</sup>: Calcd m/z 122.0247, Found m/z 122.0212. <sup>1</sup>H NMR (400.21 MHz, CDCl<sub>3</sub>), δ(ppm): 8.36-8.37 (m, 1H), 7.90-7.92 (m, 1H), 7.42-7.45 (m, 1H), 6.95-6.98 (m, 1H), 2.19-2.27 (m, 8H, P-CH<sub>2</sub>-), 1.25-1.34 (m, 16H, -CH<sub>2</sub>-), 0.72-0.74 (t, 3J<sub>HH</sub> = 7.1 Hz, 12H, -CH<sub>3</sub>) ppm. <sup>13</sup>C NMR (100.64 MHz, CDCl<sub>3</sub>): 170.56, 158.10, 148.48, 135.74, 123.94, 123.10, 24.21, 24.12, 24.06, 19.10, 18.63, 13.65 ppm. <sup>31</sup>P NMR (162.01 MHz, CDCl<sub>3</sub>): 33.08 ppm.

**(P<sub>4444</sub>)(2,5-PyrA):** Transparent yellow room temperature liquid. MS (ESI). [C<sub>16</sub>H<sub>36</sub>P]<sup>+</sup>: Calcd m/z 259.2556. Found m/z 259.2562, MS (ESI). [C<sub>6</sub>H<sub>4</sub>NO<sub>2</sub>]<sup>-</sup>: Calcd m/z 123.0200, Found m/z 123.0146. <sup>1</sup>H NMR (400.21 MHz, CDCl<sub>3</sub>), δ(ppm): 8.52-8.54 (m, 2H), 7.82-7.84 (m, 2H), 2.29-

2.36 (m, 8H, P-CH<sub>2</sub>-), 1.46-1.49 (m, 16H, -CH<sub>2</sub>-), 0.90-0.93 (t,  $3J_{\text{HH}} = 7.1$  Hz, 12H, -CH<sub>3</sub>) ppm.

<sup>13</sup>C NMR (100.64 MHz, CDCl<sub>3</sub>): 168.78, 152.64, 146.21, 143.81, 143.39, 24.26, 24.10, 24.05,

19.17, 18.70, 13.65 ppm. <sup>31</sup>P NMR (162.01 MHz, CDCl<sub>3</sub>): 33.19 ppm.

**(P<sub>4444</sub>)(Pyr-2,6-diA)**: White crystalline solid. MS (ESI). [C<sub>16</sub>H<sub>36</sub>P]<sup>+</sup>: Calcd m/z 259.2556. Found

m/z 259.2562, [C<sub>7</sub>H<sub>3</sub>NO<sub>4</sub>]<sup>2-</sup>: Calcd m/z 165.10412, Found m/z 166.0146. Found m/z 389.157. <sup>1</sup>H

NMR (400.21 MHz, CDCl<sub>3</sub>),  $\delta$ (ppm): 8.09-8.11 (m, 2H), 7.59-7.61 (m, 1H), 2.21-2.27 (m, 16H,

P-CH<sub>2</sub>-), 1.36-1.37 (m, 32H, -CH<sub>2</sub>-), 0.84-0.87 (t,  $3J_{\text{HH}} = 7.1$  Hz, 24H, -CH<sub>3</sub>) ppm. <sup>13</sup>C NMR

(100.64 MHz, CDCl<sub>3</sub>): 170.39, 155.85, 135.85, 124.22, 24.02, 23.99, 23.95, 23.87, 18.93, 18.46,

13.65 ppm. <sup>31</sup>P NMR (162.01 MHz, CDCl<sub>3</sub>): 32.80 ppm.

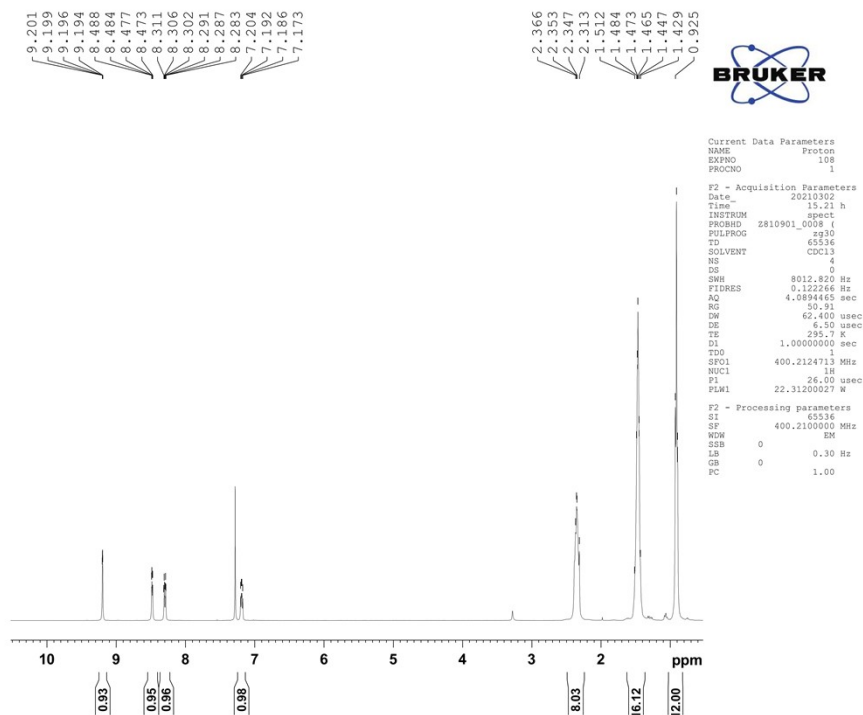

Figure S1. <sup>1</sup>H NMR spectrum of (P<sub>4444</sub>)(3-PyrA) in CDCl<sub>3</sub>.

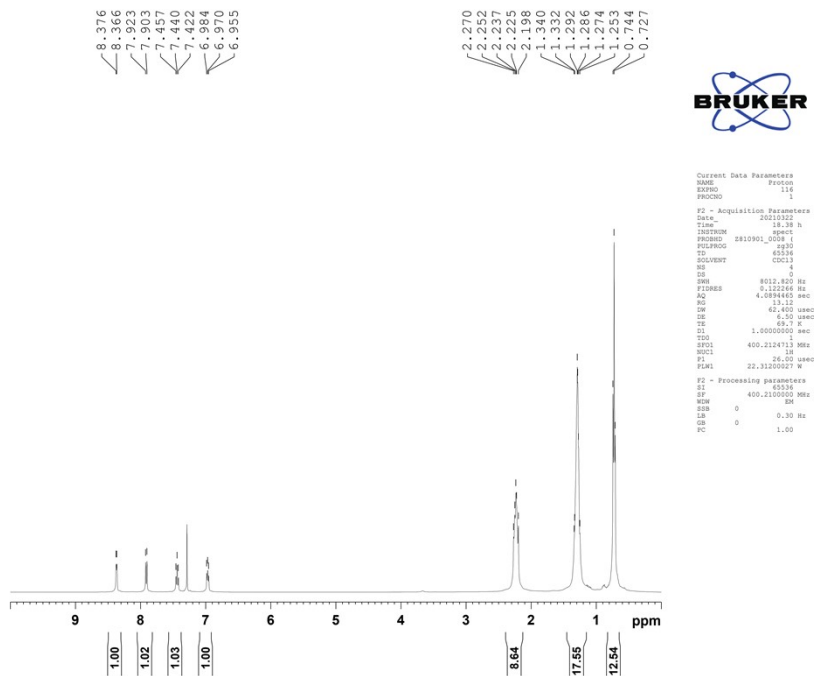

Figure S2. <sup>1</sup>H NMR spectrum of (P<sub>4444</sub>)(2-PyrA) in CDCl<sub>3</sub>.

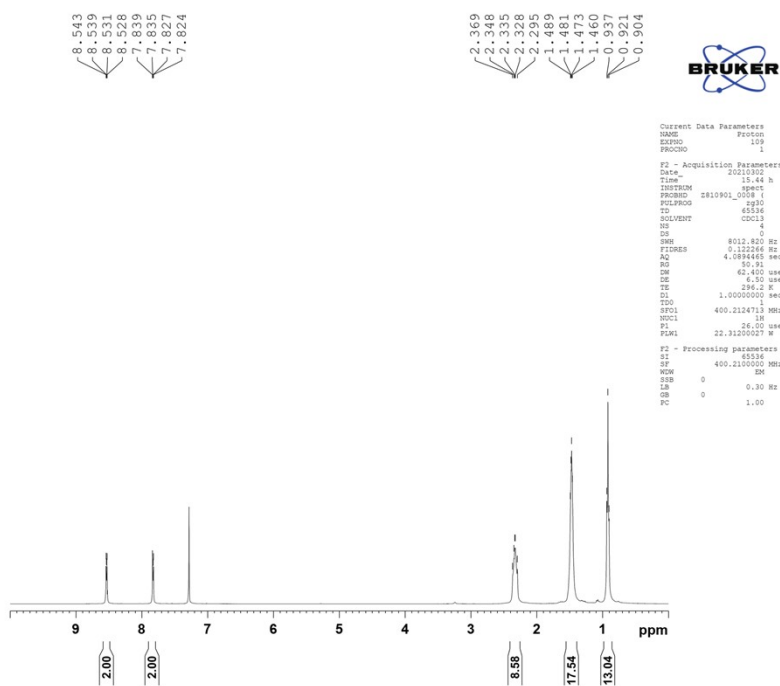

Figure S3. <sup>1</sup>H NMR spectrum of (P<sub>4444</sub>)(4-PyrA) in CDCl<sub>3</sub>.

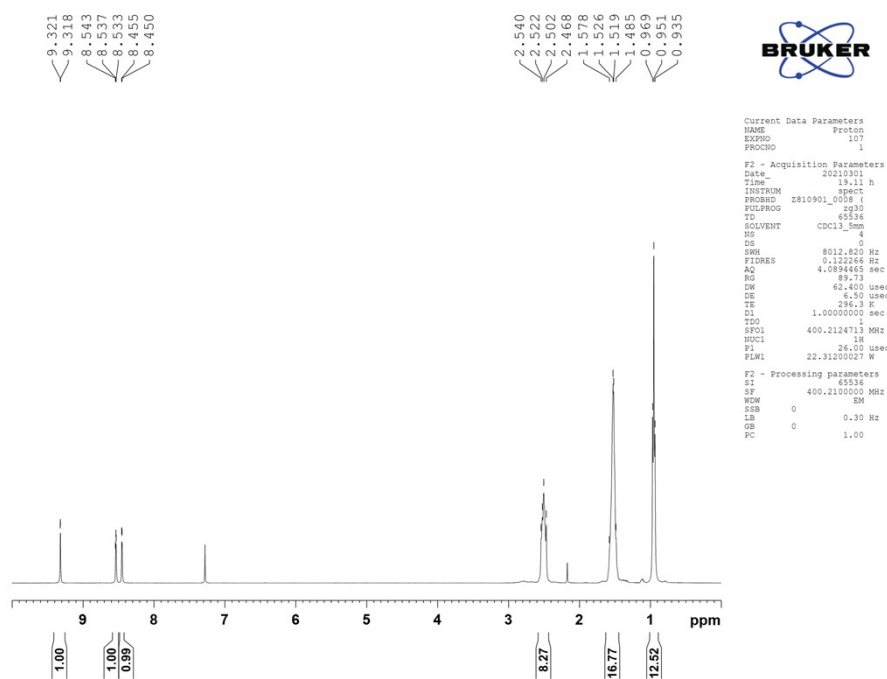

Figure S4. <sup>1</sup>H NMR spectrum of (P<sub>4444</sub>)(2,5-PyrA) in CDCl<sub>3</sub>.

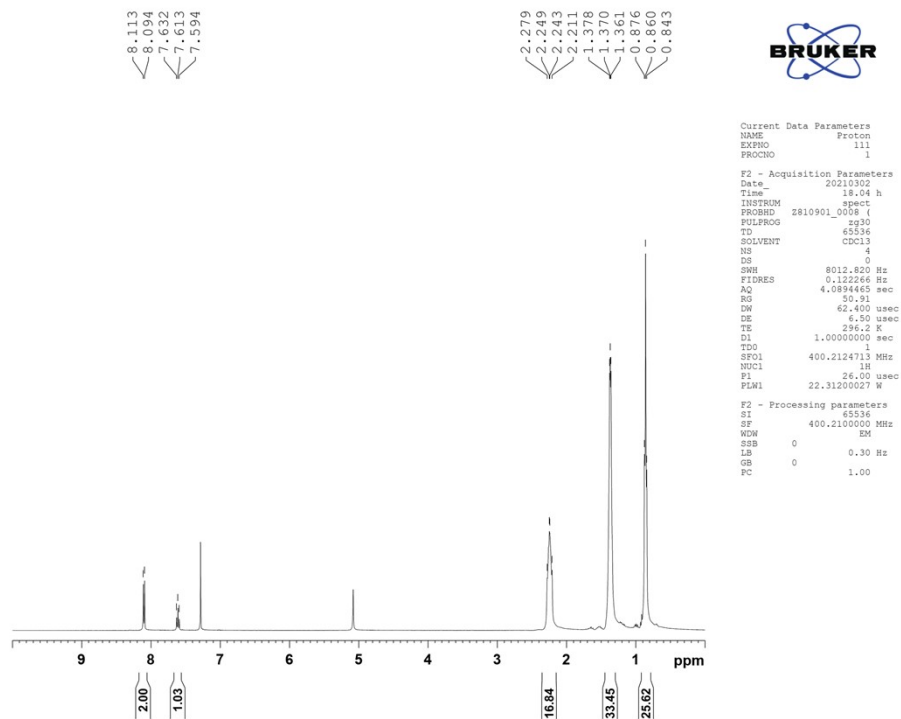

Figure S5. <sup>1</sup>H NMR spectrum of (P<sub>4444</sub>)(Pyr-2,6-diA) in CDCl<sub>3</sub>.

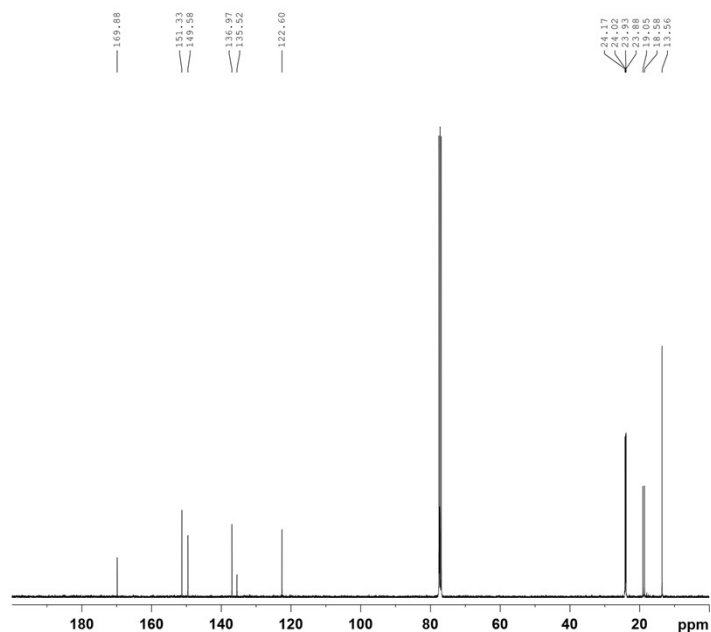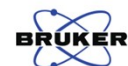

```

Current Data Parameters
NAME      Carbon
EXPNO    14
PROCNO   1

F2 - Acquisition Parameters
Date_    20210303
Time     15:18 h
PROBHD   5mmBBO
PULPROG  zgpg30
PC       zgpg30
SOLVENT  CDCl3
NS       167
DS       4
SWH       24038.461 Hz
FIDRES   0.366798 Hz
AQ       1.362148E sec
RG       199.74
DE       0.600000 usec
TE       300.2 K
D1       5.0000000 sec
d11      0.0300000 sec
D15      15.00
SFO1     100.628475 MHz
NUC1      13
P1        15.00 usec
PL1       0.00
SFO2     71.4619779 MHz
NUC2      1H
P2        90.00 usec
PL2       0.00
SFO3     400.2116008 MHz
NUC3      13
CPDPRG2  waltz16
PCPD2    90.00 usec
PLM2     22.3120027 W
PLM3     1.8518128 W
PLM13    0.92817879 W

F2 - Processing parameters
SI       32768
SF       100.628475 MHz
WDW      EM
SSB      0
LB       1.00 Hz
GB       0
PC       1.40
  
```

Figure S6. <sup>13</sup>C NMR spectrum of (P<sub>4444</sub>)(2-PyrA) in CDCl<sub>3</sub>.

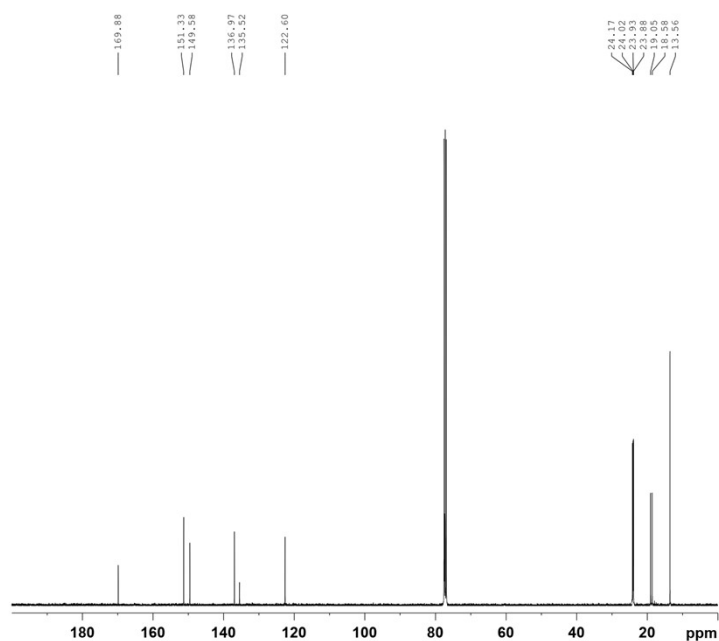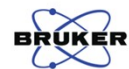

```

Current Data Parameters
NAME      Carbon
EXPNO    14
PROCNO   1

F2 - Acquisition Parameters
Date_    20210303
Time     15:18 h
PROBHD   5mmBBO
PULPROG  zgpg30
PC       zgpg30
SOLVENT  CDCl3
NS       167
DS       4
SWH       24038.461 Hz
FIDRES   0.366798 Hz
AQ       1.362148E sec
RG       199.74
DE       0.600000 usec
TE       300.2 K
D1       5.0000000 sec
d11      0.0300000 sec
D15      15.00
SFO1     100.628475 MHz
NUC1      13
P1        15.00 usec
PL1       0.00
SFO2     71.4619779 MHz
NUC2      1H
P2        90.00 usec
PL2       0.00
SFO3     400.2116008 MHz
NUC3      13
CPDPRG2  waltz16
PCPD2    90.00 usec
PLM2     22.3120027 W
PLM3     1.8518128 W
PLM13    0.92817879 W

F2 - Processing parameters
SI       32768
SF       100.628475 MHz
WDW      EM
SSB      0
LB       1.00 Hz
GB       0
PC       1.40
  
```

Figure S7. <sup>13</sup>C NMR spectrum of (P<sub>4444</sub>)(3-PyrA) in CDCl<sub>3</sub>.

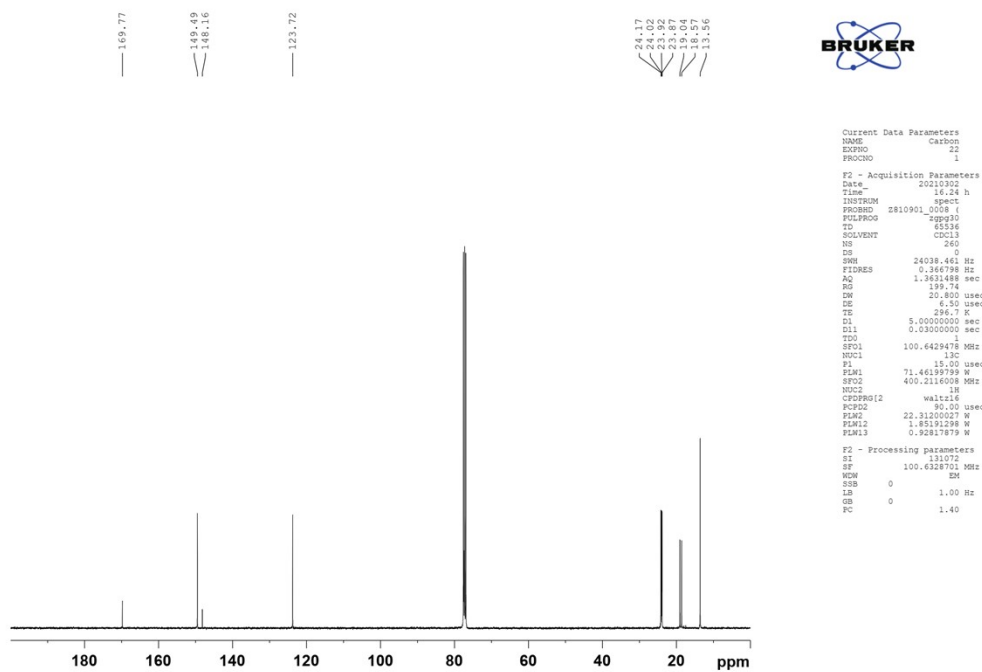

Figure S8. <sup>13</sup>C NMR spectrum of (P<sub>4444</sub>)(4-PyrA) in CDCl<sub>3</sub>.

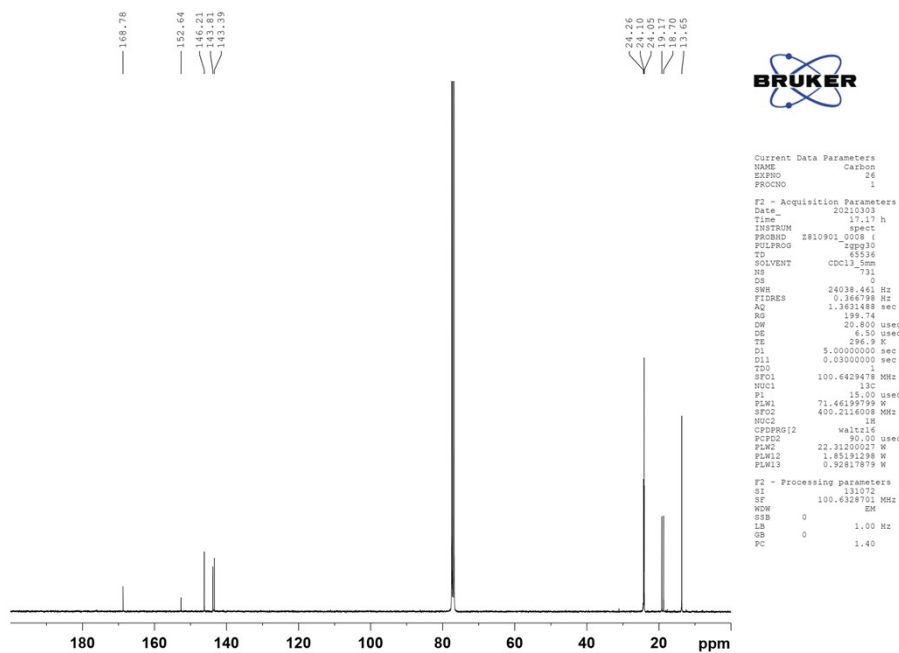

Figure S9. <sup>13</sup>C NMR spectrum of (P<sub>4444</sub>)(2,5-PyrA) in CDCl<sub>3</sub>.

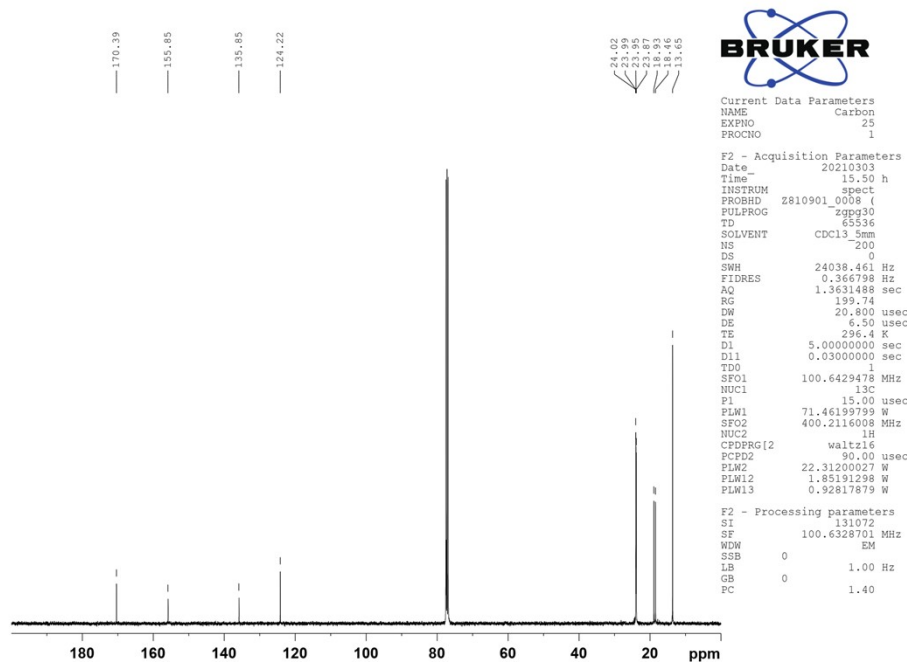

Figure S10.  $^{13}\text{C}$  NMR spectrum of  $(\text{P}_{4444})(\text{Pyr-2,6-diA})$  in  $\text{CDCl}_3$ .

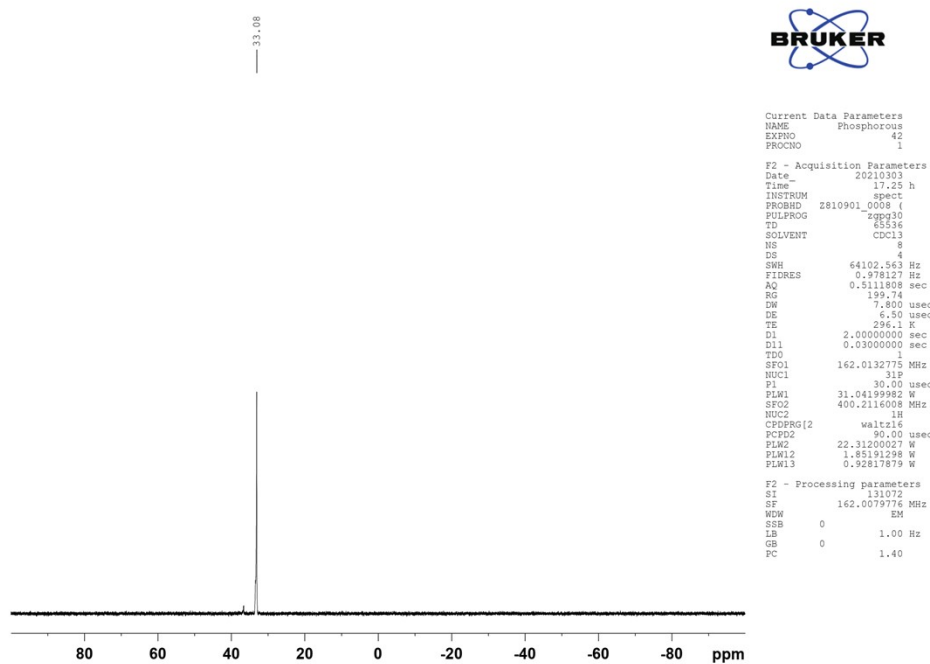

Figure S11.  $^{31}\text{P}$  NMR spectrum of  $(\text{P}_{4444})(2\text{-PyrA})$  in  $\text{CDCl}_3$ .



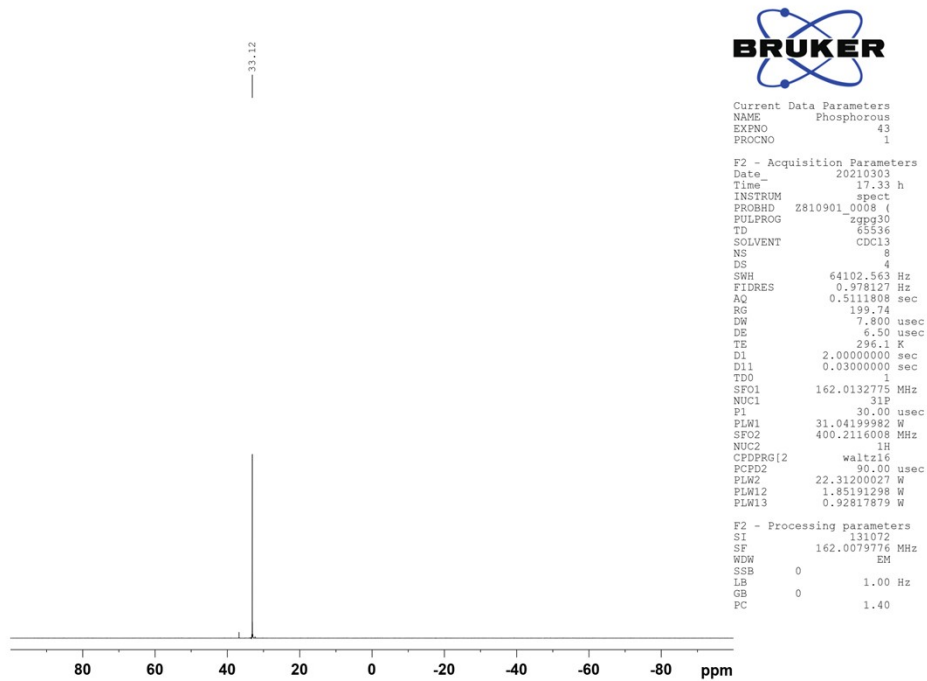

Figure S12.  $^{31}\text{P}$  NMR spectrum of  $(\text{P}_{4444})(3\text{-PyrA})$  in  $\text{CDCl}_3$ .

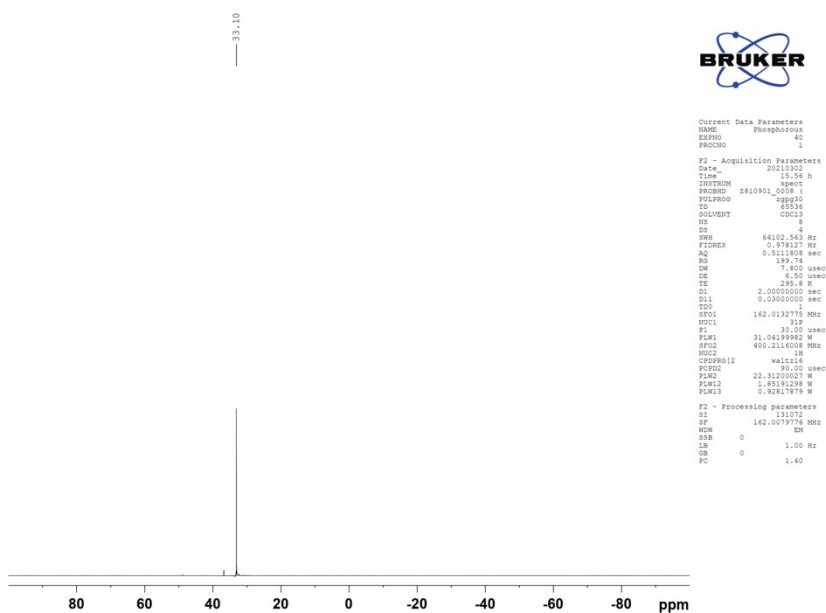

Figure S13.  $^{31}\text{P}$  NMR spectrum of  $(\text{P}_{4444})(4\text{-PyrA})$  in  $\text{CDCl}_3$ .

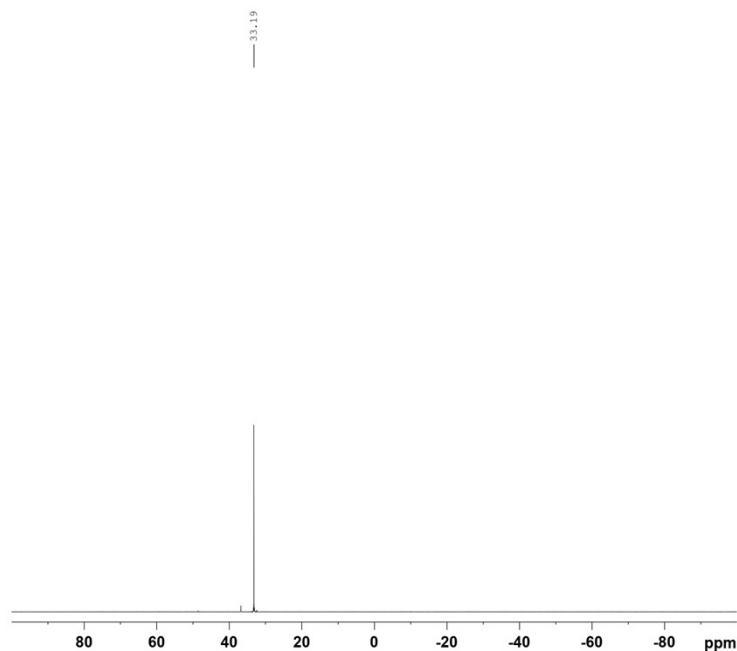

Figure S14.  $^{31}\text{P}$  NMR spectrum of  $(\text{P}_{4444})(2,5\text{-PyrA})$  in  $\text{CDCl}_3$ .

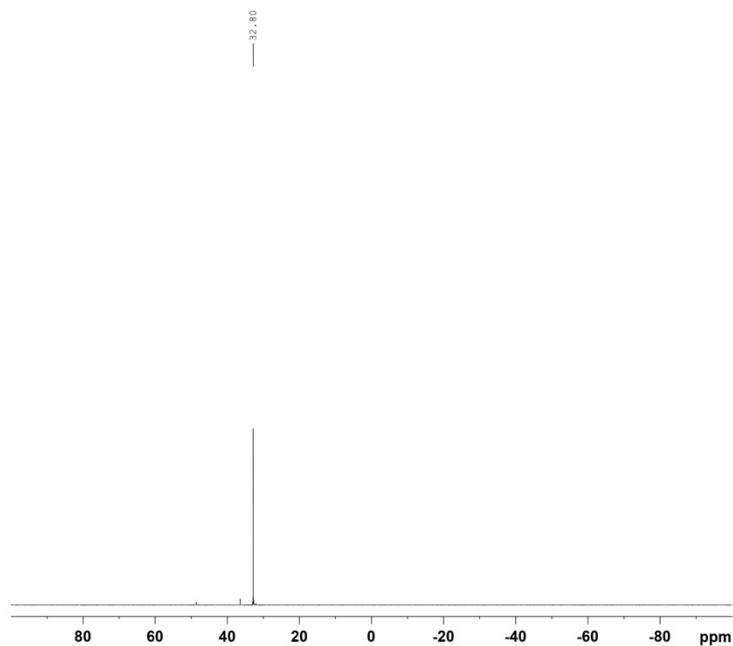

Figure S15.  $^{31}\text{P}$  NMR spectrum of  $(\text{P}_{4444})(\text{Pyr-2,6-diA})$  in  $\text{CDCl}_3$ .

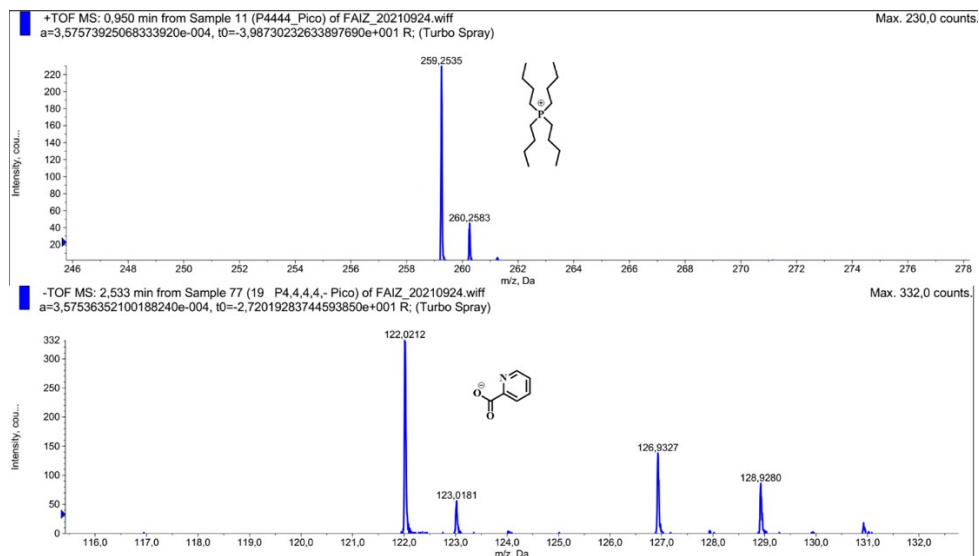

Figure S16. ESI-MS of (P<sub>4444</sub>)(2-PyrA)

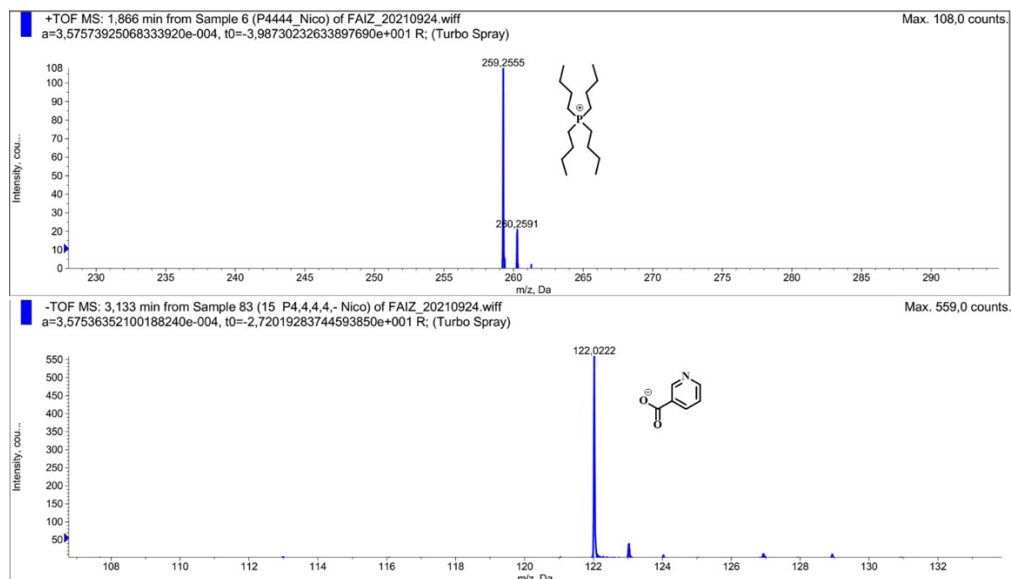

Figure S17. ESI-MS of (P<sub>4444</sub>)(3-PyrA)

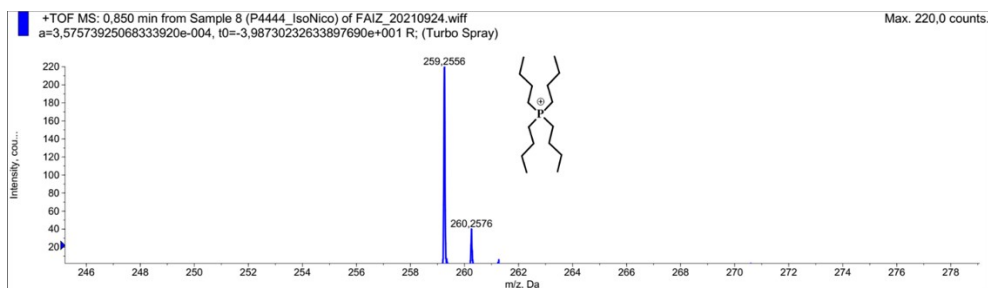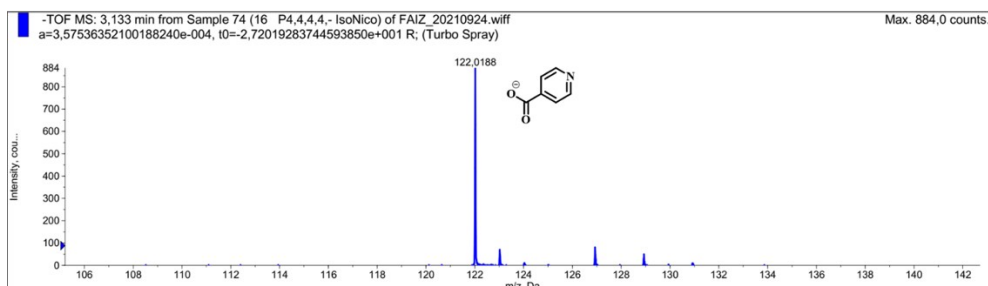

Figure S18. ESI-MS of (P<sub>4444</sub>)(4-PyrA)

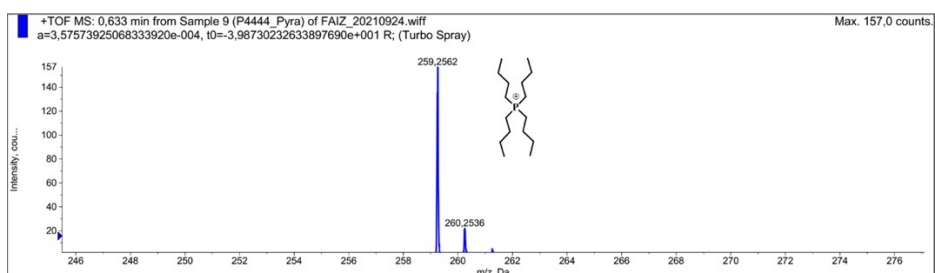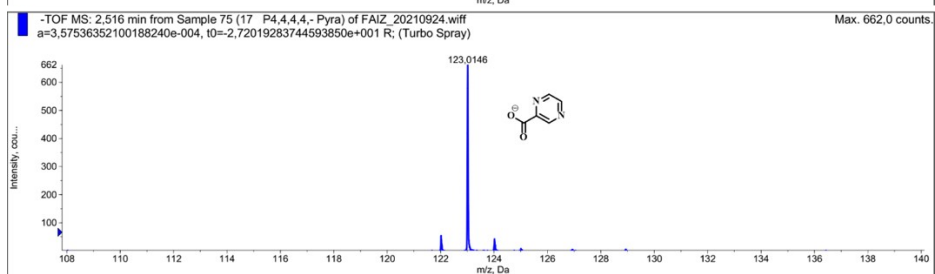

Figure S19. ESI-MS of (P<sub>4444</sub>)(2,6-PyrA)

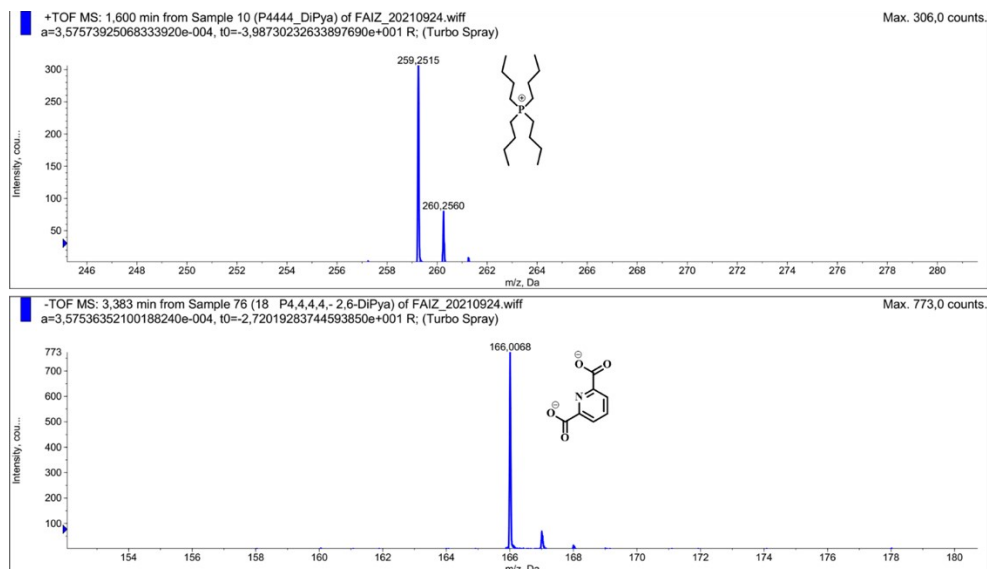

Figure S20. ESI-MS of (P<sub>4444</sub>)(Pyr-2,6-diA)

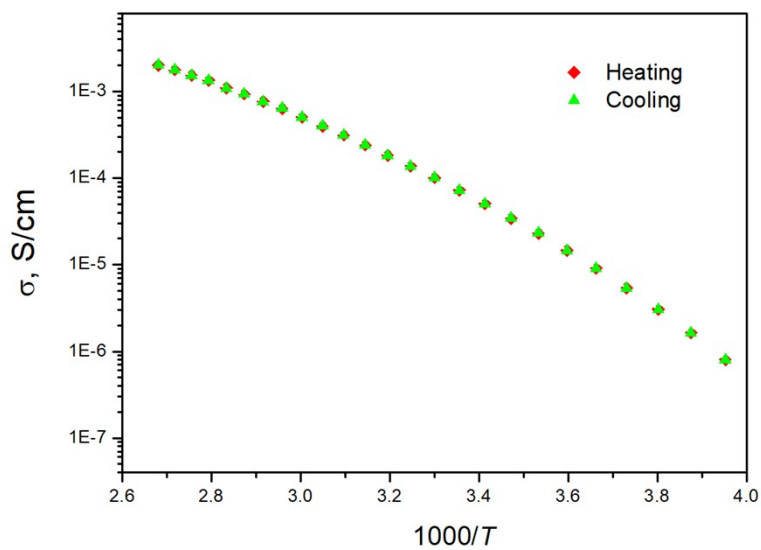

Figure S21. Heating and cooling cycles of the ionic conductivity of (P<sub>4444</sub>)(3-PyrA)

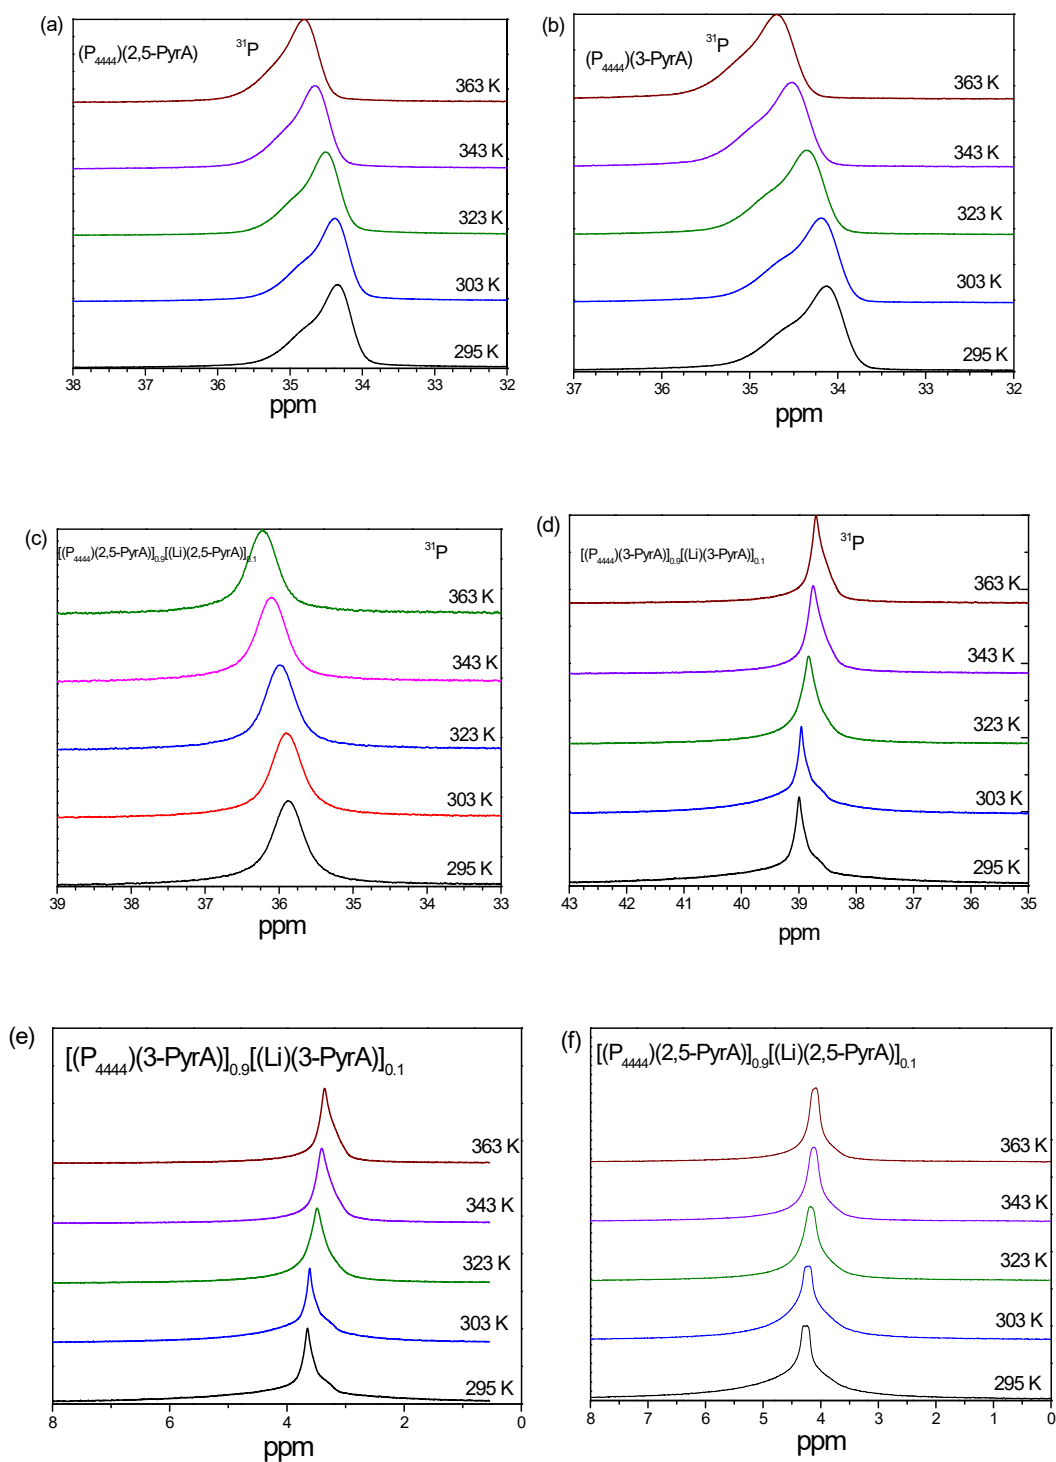

Figure S22.  $^{31}\text{P}$  NMR spectra of (a)  $[(\text{P}_{4444})(2,5\text{-PyrA})]$  (b)  $[(\text{P}_{4444})(3\text{-PyrA})]$  (c)  $[(\text{P}_{4444})(2,5\text{-PyrA})]_{0.9}[(\text{Li})(2,5\text{-PyrA})]_{0.1}$  and (d)  $[(\text{P}_{4444})(3\text{-PyrA})]_{0.9}[(\text{Li})(3\text{-PyrA})]_{0.1}$  and  $^7\text{Li}$  NMR (e)  $[(\text{P}_{4444})(3\text{-PyrA})]_{0.9}[(\text{Li})(3\text{-PyrA})]_{0.1}$  and (f)  $[(\text{P}_{4444})(2,5\text{-PyrA})]_{0.9}[(\text{Li})(2,5\text{-PyrA})]_{0.1}$  as a function of temperature.

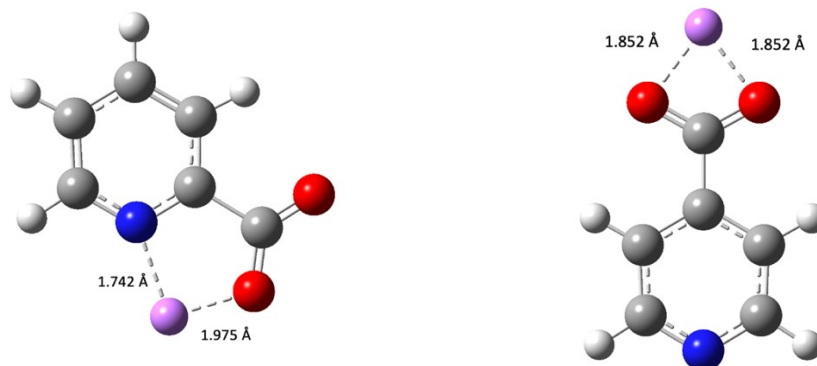

(a) 2-PyrA (-709 kJ mol<sup>-1</sup>)

(b) 4-PyrA (-666 kJ mol<sup>-1</sup>)

Figure S23: Optimized geometries of the various Li<sup>+</sup>-ion-pairs for: (a) (2-PyrA)<sup>-</sup> and (b) (4-PyrA)<sup>-</sup>, and including coordination bond distances and association energies.

Table S1. VFT equation parameters and apparent activation energies for ionic conductivity of the ionic liquids and the electrolytes.

| System                                                                         | $\sigma_0$<br>mS/cm | $B, K$ | $T_0, K$ | $E\sigma,$<br>kJ/(mol) |
|--------------------------------------------------------------------------------|---------------------|--------|----------|------------------------|
| (P <sub>4444</sub> ) (3-PyrA)                                                  | 1.218               | 1381   | 156      | 11.4                   |
| (P <sub>4444</sub> ) (2,5-PyrA)                                                | 0.135               | 1496   | 150      | 12.4                   |
| [(P <sub>4444</sub> )(3-PyrA)] <sub>0.9</sub> [Li(3-PyrA)] <sub>0.1</sub>      | 2.352               | 1600   | 148      | 13.3                   |
| [(P <sub>4444</sub> ) (2,6-PyrA)] <sub>0.9</sub> [Li(2,6-PyrA)] <sub>0.1</sub> | 0.216               | 1626   | 143      | 13.5                   |

Table S2. VFT equation parameters and apparent activation energies for ion diffusivity of the ionic liquids and the electrolytes.

| System                                                                         | ion                               | $D_0 \times 10^{-8}$<br>m <sup>2</sup> /s | B, K | $T_0$ , K | $E_D$ ,<br>kJ/(mol) |
|--------------------------------------------------------------------------------|-----------------------------------|-------------------------------------------|------|-----------|---------------------|
| (P <sub>4444</sub> ) (3-PyrA)                                                  | (3-PyrA) <sup>-</sup>             | 1.55                                      | 800  | 213       | 6.7                 |
|                                                                                | (P <sub>4444</sub> ) <sup>+</sup> | 1.49                                      | 826  | 211       | 6.9                 |
| [(P <sub>4444</sub> )(3-PyrA)] <sub>0.9</sub> [Li(3-PyrA)] <sub>0.1</sub>      | (3-PyrA) <sup>-</sup>             | 5.07                                      | 1100 | 200       | 9.2                 |
|                                                                                | (P <sub>4444</sub> ) <sup>+</sup> | 3.36                                      | 1000 | 204       | 8.3                 |
|                                                                                | Li <sup>+</sup>                   | 6.46                                      | 1124 | 205       | 9.3                 |
| (P <sub>4444</sub> ) (2,5-PyrA)                                                | (2,6-PyrA) <sup>-</sup>           | 1.53                                      | 853  | 210       | 7.1                 |
|                                                                                | (2,5-PyrA) <sup>-</sup>           | 1.59                                      | 892  | 207       | 7.4                 |
|                                                                                | (P <sub>4444</sub> ) <sup>+</sup> |                                           |      |           |                     |
| [(P <sub>4444</sub> ) (2,5-PyrA)] <sub>0.9</sub> [Li(2,5-PyrA)] <sub>0.1</sub> | (2,6-PyrA) <sup>-</sup>           | 3.20                                      | 990  | 205       | 8.2                 |
|                                                                                | (2,5-PyrA) <sup>-</sup>           | 3.03                                      | 998  | 205       | 8.3                 |
|                                                                                | (P <sub>4444</sub> ) <sup>+</sup> | 3.50                                      | 1024 | 205       | 8.5                 |
|                                                                                | Li <sup>+</sup>                   |                                           |      |           |                     |



Table S3. Anodic and cathodic limits, and electrochemical stability windows (ESWs) of the neat ionic liquids and the electrolytes at 0.10 mA cm<sup>-2</sup> cut-off current density using GC as WE at 293K vs. Li/Li<sup>+</sup>.

| System                                                                        | $E_A$ (V) | $E_C$ (V) | $\Delta E$ (V) |
|-------------------------------------------------------------------------------|-----------|-----------|----------------|
| (P <sub>4444</sub> )(3-PyrA)                                                  | 4.97      | 1.39      | 3.57           |
| [(P <sub>4444</sub> )(3-PyrA)] <sub>0.9</sub> [Li(3-PyrA)] <sub>0.1</sub>     | 5.03      | 1.29      | 3.74           |
| (P <sub>4444</sub> )(2,5-PyrA)                                                | 4.09      | 1.27      | 2.82           |
| [(P <sub>4444</sub> )(2,5-PyrA)] <sub>0.9</sub> [Li(2,5-PyrA)] <sub>0.1</sub> | 4.15      | 1.02      | 3.13           |

Table S4: Main interacting donor and acceptor NBOs and the second order perturbation energy E for the (2-PyrA)<sup>-</sup> anion and its Li<sup>+</sup> ion-pair.

| From             | To                 | 2-PyrA       | Li <sup>+</sup> -2-PyrA |
|------------------|--------------------|--------------|-------------------------|
| Donor NBO        | Acceptor NBO       | E (kcal/mol) |                         |
| $\sigma$ C1 – N1 | $\pi^*$ C4 – C5    | 42.75        | 199.20                  |
| $\pi$ C2 – C3    | $\sigma^*$ C1 – N1 | 33.50        | 44.21                   |
| $\pi$ C2 – C3    | $\pi^*$ C4 – C5    | 26.45        | 25.74                   |
| $\pi$ C4 – C5    | $\sigma^*$ C1 – N1 | 21.50        | 22.73                   |
| $\pi$ C4 – C5    | $\pi^*$ C2 –C3     | 29.34        | 179.32                  |
| LP O2            | $\pi^*$ Ca –O1     | 134.73       | 27.61                   |
| $\sigma$ C1 – N1 | $\pi^*$ Ca –O1     | 48.80        | 34.21                   |
| $\pi$ C4 – C5    | $\sigma^*$ C1 – N1 | 161.29       | 22.73                   |
| $\pi$ C4 – C5    | $\sigma^*$ C2 –C3  | 218.62       | 28.88                   |
| LP O 1           | $\pi^*$ Ca – O2    | 23.25        | 99.84                   |
| LP O1            | $\sigma^*$ C1 – Ca | 26.24        | 15.46                   |
| LP O2            | $\sigma^*$ C1 – Ca | 22.65        |                         |
| LP N1            | $\sigma^*$ C4 – C5 | 11.31        | 8.50                    |
| LP N1            | $\sigma^*$ C1 –C2  | 10.70        | 9.48                    |
| $\sigma$ C1 – N1 | $\pi^*$ C2 –C3     | 19.69        | 133.03                  |
| $\sigma$ C1 – N1 | $\pi^*$ Ca–O2      |              | 34.21                   |
| $\sigma$ C1 – N1 | $\pi^*$ C4 –C5     | 42.75        | 35.24                   |

Table S5: Main interacting donor and acceptor NBOs and the second order perturbation energy E for the (3-PyrA)<sup>-</sup> anion and its Li<sup>+</sup> ion-pair.

| From             | To                 | 3-PyrA     | Li <sup>+</sup> -3-PyrA |
|------------------|--------------------|------------|-------------------------|
| Donor NBO        | Acceptor NBO       | E kcal/mol |                         |
| $\sigma$ C1 – N1 | $\pi^*$ C4 – C5    | 38.10      |                         |
| $\sigma$ C3 – C2 | $\sigma^*$ C1 – N1 | 40.42      |                         |
| $\sigma$ C3 – C2 | $\pi^*$ C4 – C5    | 28.78      |                         |
| $\pi$ C4 – C5    | $\sigma^*$ C1 – N1 | 22.84      |                         |
| $\pi$ C4 – C5    | $\sigma^*$ C3 – C2 | 27.78      |                         |
| LP O1            | $\pi^*$ C2 – Ca    | 22.86      | 18.41                   |
| LP O1            | $\pi^*$ Ca – O2    | 142.82     | 18.89                   |
| LP O2            | $\pi^*$ C2 – Ca    | 22.97      | 18.52                   |
| LP O2            | $\pi^*$ Ca = O1    | 22.80      | 19.03                   |
| $\sigma$ C1 – N1 | $\sigma^*$ C3 – C2 | 124.99     |                         |
| $\sigma$ C4 – C3 | $\pi^*$ Ca – O2    | 73.94      |                         |
| $\sigma$ C4 – C3 | $\sigma^*$ C3 – C2 | 92.60      |                         |
| LP N1            | $\sigma^*$ C1 – C2 | 9.70       |                         |
| LP N1            | $\sigma^*$ C1 – H  | 4.61       |                         |
| LP N1            | $\sigma^*$ C1 – C5 | 10.40      |                         |
| LP N1            | $\sigma^*$ C5 – H  | 5.14       |                         |
| $\sigma$ C5 – N1 | $\sigma^*$ C1 – C2 |            | 210.51                  |
| $\sigma$ C3 – N1 | $\sigma^*$ C3 – C4 |            | 242.33                  |
| $\pi$ C1 – C2    | $\sigma^*$ C5 – N1 |            | 24.35                   |
| $\pi$ C1 – C2    | $\sigma^*$ C3 – C4 |            | 33.66                   |
| $\sigma$ C3 – C4 | $\sigma^*$ C1 – C2 |            | 23.89                   |
| $\sigma$ C3 – C4 | $\sigma^*$ C5 – N1 |            | 40.90                   |

Table S6: Main interacting donor and acceptor NBOs and the second order perturbation energy E for the (4-PyrA)<sup>-</sup> anion and its Li<sup>+</sup> ion-pair.

| From              | To                  | 4-PyrA     | Li <sup>+</sup> -4-PyrA |
|-------------------|---------------------|------------|-------------------------|
| Donor NBO         | Acceptor NBO        | E kcal/mol |                         |
| $\pi$ C 1 – C2    | $\sigma^*$ C4 – C3  | 29.99      | 32.27                   |
| $\pi$ C 1 – C2    | $\sigma^*$ C5 – N1  | 27.04      | 28.31                   |
| $\sigma$ C4 – C3  | $\pi^*$ C1 – C2     | 26.05      | 25.51                   |
| $\sigma$ C4 – C3  | $\sigma^*$ C5 – N1  | 45.80      | 36.67                   |
| $\sigma$ C5 – N1  | $\pi^*$ C 1 – C2    | 33.25      | 34.96                   |
| LP O2             | $\sigma^*$ C3 – Ca  | 23.22      | 0.99                    |
| LP O2             | $\sigma^*$ Ca – O1  | 22.57      | 18.95                   |
| LP O2             | LP*Ca               | 244.22     | 206.27                  |
| LP O1             | $\sigma^*$ C3 – Ca  | 23.22      | 18.79                   |
| LP O1             | $\pi^*$ Ca – O2     | 22.57      | 18.96                   |
| $\pi$ C 1 – C2    | $\sigma^*$ C4 – C3  | 168.46     | 3.25                    |
| $\sigma$ C5 – N1  | $\pi^*$ C1 – C2     | 145.58     | 217.56                  |
| $\sigma$ C5 – N 1 | $\sigma^*$ C 4 – C3 | 90.27      | 256.64                  |
| LP N1             | $\pi^*$ C1– C2      | 9.86       | 10.22                   |
| LP N1             | $\sigma^*$ C1– H    | 4.98       | 5.15                    |
| LP N1             | $\pi^*$ C4– C5      | 9.86       | 10.22                   |
| LP N1             | $\sigma^*$ C5– H    | 4.98       | 5.15                    |

Table S7: Main interacting donor and acceptor NBOs and the second order perturbation energy E for the (2,5-PyrA)<sup>-</sup> anion and its Li<sup>+</sup> ion-pair.

| From              | To                  | 2,5-PyrA   | Li <sup>+</sup> -2,5-PyrA |
|-------------------|---------------------|------------|---------------------------|
| Donor NBO         | Acceptor NBO        | E kcal/mol |                           |
| $\sigma$ C1 – N1  | $\sigma^*$ C 2 – N2 | 25.55      | 19.85                     |
| $\sigma$ C1 – N1  | $\sigma^*$ C3 – C4  | 37.33      | 31.59                     |
| $\sigma$ C2 – N2  | $\sigma^*$ C1 – N1  | 22.42      | 28.30                     |
| $\sigma$ C2 – N2  | $\pi^*$ C3 – C4     | 33.10      | 34.08                     |
| $\sigma$ C3 – C4  | $\sigma^*$ C1 – N1  | 24.15      | 27.60                     |
| $\sigma$ C3 – C 4 | $\sigma^*$ C2 – N2  | 26.38      | 26.37                     |
| LP O2             | $\sigma^*$ C1 – Ca  | 23.08      | 26.34                     |
| LP O2             | $\sigma^*$ Ca– O1   | 136.53     | 27.69                     |
| LP O1             | $\sigma^*$ C1 – Ca  | 26.78      | 15.92                     |
| LP O1             | $\sigma^*$ Ca – O2  | 23.23      | 99.57                     |
| $\sigma$ C1 – N1  | $\sigma^*$ Ca – O1  | 44.14      | 30.33                     |
| $\sigma$ C2 – N2  | $\sigma^*$ C1 – N1  | 225.77     | 218.96                    |
| $\pi$ C3 – C4     | $\sigma^*$ C1 – N1  | 155.98     | 174.89                    |
